1     **How to use online tools to generate new hypotheses for**  
2     **mammary gland biology research: a case study for *Wnt7b***

3

4

5     Yorick Bernardus Cornelis van de Grift\*, Nika Heijmans\*, Renée van Amerongen\*^#

6

7             \*Swammerdam Institute for Life Sciences, University of Amsterdam,

8                     Science Park 904, 1098 XH Amsterdam, the Netherlands

9

10    ^ corresponding author

11

12    Corresponding author e-mail: [r.vanamerongen@uva.nl](mailto:r.vanamerongen@uva.nl)

13

14    # Twitter: @wntlab

15

16    ORCID IDs:

17    YBCvdG: 0000-0003-0920-9030

18    NH: 0000-0002-5639-9407

19    RvA: 0000-0002-8808-2092

20

21 **Abstract**

22

23 An increasing number of ‘-omics’ datasets, generated by labs all across the  
24 world, are becoming available. They contain a wealth of data that are largely  
25 unexplored. Not every scientist, however, will have access to the required resources  
26 and expertise to analyze such data from scratch. Luckily, a growing number of  
27 investigators is dedicating their time and effort to the development of user friendly,  
28 online applications that allow researchers to use and investigate these datasets. Here,  
29 we will illustrate the usefulness of such an approach.

30 Using regulation of *Wnt7b* as an example, we will highlight a selection of  
31 accessible tools and resources that are available to researchers in the area of  
32 mammary gland biology. We show how they can be used for *in silico* analyses of gene  
33 regulatory mechanisms, resulting in new hypotheses and providing leads for  
34 experimental follow up. We also call out to the mammary gland community to join  
35 forces in a coordinated effort to generate and share additional tissue-specific ‘-omics’  
36 datasets and thereby expand the *in silico* toolbox.

37

38 **Keywords:**

39 Wnt signaling, CTNNB1, beta-catenin, in silico analysis, *Wnt7b*, gene regulation

## 40 Introduction

41 The experimental technology that allows genome wide analyses at the  
42 molecular level (genomics, epigenomics, transcriptomics, metabolomics and  
43 proteomics – hereafter combinedly referred to as ‘omics’ approaches) continues to  
44 evolve at breathtaking speed. Despite the fact that these techniques are becoming  
45 more affordable and therefore more widely available for scientists worldwide, they are  
46 still quite expensive – a prohibitory factor for those with limited financial resources.  
47 This is especially true for sophisticated approaches such as single-cell RNA  
48 sequencing (scRNAseq) and other-single cell approaches that are still being  
49 developed. Moreover, not everyone will have local access to the required  
50 infrastructure. Of course, scientific collaborations can offer a solution. Even then, it  
51 can be a challenge to integrate a variety of these technologies into one’s research  
52 program [1].

53 As can be gleaned from the published literature, all too frequently only a few  
54 hits or top candidates are followed up in instances where genome-wide datasets are  
55 generated. As a consequence, a wealth of data remains unexplored. These datasets  
56 constitute a rich and valuable resource for the larger scientific community. As an  
57 example, we have previously used published microarray data to identify the most  
58 stably rather than the most differentially expressed genes, resulting in a new set of  
59 reference genes for qRT-PCR studies in the developing mouse mammary gland [2].

60 Most ‘omics’ datasets are deposited in public repositories such as the NCBI  
61 Gene Expression Omnibus (<https://www.ncbi.nlm.nih.gov/geo/>), either in raw format  
62 or in a more processed form. While this makes them available to all scientists in theory,  
63 in practice not everyone has the bioinformatics skills and expertise to analyze these  
64 data from scratch. Fortunately, multiple labs are dedicating their time and effort to the  
65 development of online tools that allow easy and intuitive access to these datasets,  
66 allowing researchers to explore them from the comfort of their own (home) office via a  
67 user friendly graphical interface.

68 Here we will highlight a selection of these online tools and demonstrate how  
69 they can be used to generate hypotheses and answer biological questions in the  
70 context of mammary gland biology. To illustrate this approach, we will build a case  
71 study around *Wnt7b*, a gene that has been implicated in mammary gland development  
72 and breast cancer, but whose precise activity and mode of regulation remain unknown.

73 We assume that the reader is familiar with the basic principles behind the  
74 different techniques (e.g. scRNAseq, snATACseq, Hi-C), as well as with the way in  
75 which these data are commonly presented (e.g. tSNE plots). Please note that for all  
76 figures we have kept the exact style and color schemes as generated by the different  
77 online tools to aid the reader in recognizing the output when they try out these tools  
78 for themselves.

79

## 80 **WNT7B in mammary gland development and breast cancer**

81 *WNT7B* is expressed in human breast tissue and its expression has been  
82 reported to be altered in breast cancer [3,4]. Its overexpression has been associated  
83 with a poor prognosis and reduced overall survival of breast cancer patients [5]. In  
84 breast cancer, *WNT7B* has not only been shown to be expressed by the tumor cells,  
85 but also by myeloid cells present in the local microenvironment. The latter promotes  
86 angiogenesis, invasion and metastasis [6].

87 Its murine counterpart, *Wnt7b*, is expressed in the ductal epithelium of the  
88 mouse mammary gland [7]. The levels of *Wnt7b* remain unaltered following  
89 ovariectomy, suggesting that *Wnt7b* gene regulation is estrogen and progesterone  
90 independent [7]. During puberty, expression of *Wnt7b* is enriched in the terminal end  
91 bud epithelium, suggesting a role in branching morphogenesis [8]. *Wnt7b* has been  
92 reported to have mild transforming activities *in vitro* [9,10] and *in vivo* [11] although not  
93 all studies agree on the extent of this effect [10,12].

94 The precise role and regulation of *Wnt7b/WNT7B* in the mammary gland or  
95 breast remain unknown. So far, evidence that WNT7B protein can promote the  
96 activation of CTNNB1/TCF transcriptional complexes is lacking, despite the fact that  
97 *Wnt7b* is readily detected and shows prominent expression in luminal cells [13]. This  
98 is in contrast to other tissues, such as the skin, where the activities of WNT7B have  
99 been linked to CTNNB1/TCF driven processes [14].

100

## 101 **Exploring spatiotemporal patterns of *Wnt7b* expression using scRNAseq data**

102 Public scRNAseq datasets are an ideal platform to start investigating  
103 spatiotemporal gene expression in the mammary gland [15,16]. We want to highlight  
104 two user friendly scRNAseq tools that allow analysis of the *in vivo* expression patterns  
105 of a gene of interest in both the embryonic and postnatal stages of mouse mammary

106 gland development (Box 1). Their combined use reveals extensive details about the  
107 expression pattern of any given gene across different stages and cell populations.

108

109 **Box 1: online scRNA-seq visualization tools**

110

111 <https://marionilab.cruk.cam.ac.uk/mammaryGland/>

112 (*Bach et al., 2017, Nature Communications* [15])

113

114 scRNAseq dataset that contains EPCAM+ sorted cells from multiple stages of the adult mammary gland  
115 cycle: (nulliparous (8w), gestation (14.5d), lactation (6d) and post-involution (11d). Expression of a gene  
116 of interest can be investigated in the context of an inferred cell type or developmental stage. Results are  
117 visualized as a tSNE plot and a box plot, both illustrating gene expression by cluster. Gene expression can  
118 also be displayed along the (luminal) differentiation trajectory in pseudotime.

119

120 <https://tabula-muris.ds.czbiohub.org/>

121 (*The Tabula Muris Consortium, 2018, Nature* [16])

122

123 Large compendium of single cell transcriptome data from the model organism *Mus musculus* that  
124 contains scRNAseq datasets from 20 adult organs and tissues, including the mammary gland. This is the  
125 only online dataset available for the mammary gland that explicitly includes stromal cells and other cell  
126 types from the supportive tissue (e.g. endothelial and immune cells). Of note, all tissues have been  
127 processed and analysed by two different protocols: cells were either FACS sorted, or single-cell sorted  
128 using microfluidic droplet-capture techniques (used for fig 1) and thus sequenced using two different  
129 methodologies, providing an innate technical validation of the data when using this tool. Fat pads 2,3 and  
130 4 were processed from virgin mice ((10-15w), and subpopulations were separated by FACS by the  
131 following markers: Basal population (CD45<sup>-</sup>, CD31<sup>-</sup>, TER119<sup>-</sup>, CD49f<sup>high-med</sup>, CD29<sup>med-low</sup>), Luminal cells  
132 (CD45<sup>-</sup>, CD31<sup>-</sup>, TER119<sup>-</sup>, CD49f<sup>med-low</sup>, CD24<sup>high-med</sup>), mammary repopulating cells (CD45<sup>-</sup>, CD31<sup>-</sup>, TER119<sup>-</sup>,  
133 CD49f<sup>high</sup>, CD24<sup>med</sup>), and stromal cells (CD45<sup>-</sup>, CD31<sup>-</sup>, TER119<sup>-</sup>, CD49f, CD24).

134

135 *Wnt7b* expression is absent (or at least below the limit of detection) in the fetal  
136 mammary gland (E18, fig1a), but emerges postnatally (fig1b,c, fig2a). Its expression  
137 is cell type specific, displaying high gene expression in the luminal compartment, and  
138 low or absent expression in basal cells and supportive tissues (fat, endothelial,  
139 immune and stromal cells) (fig1c).

140 Spatiotemporal expression is dynamically regulated throughout the adult  
141 mammary gland cycle (fig2a,b). In nulliparous mice, *Wnt7b* is expressed in luminal

142 progenitor cells, as well as in more differentiated, hormone-sensing luminal progeny  
 143 (fig2b,c). During gestation and lactation *Wnt7b* expression is switched off, but it re-  
 144 emerges post-involution (fig2b,c). Thus, it is exclusively expressed in the ‘resting’  
 145 state, be it nulliparous or post-involution. Of note, although the luminal progenitor  
 146 population itself re-appears post-involution, *Wnt7b* expression is lost in this population,  
 147 becoming restricted to the hormone-sensing luminal lineage post-pregnancy (fig2b,c).  
 148

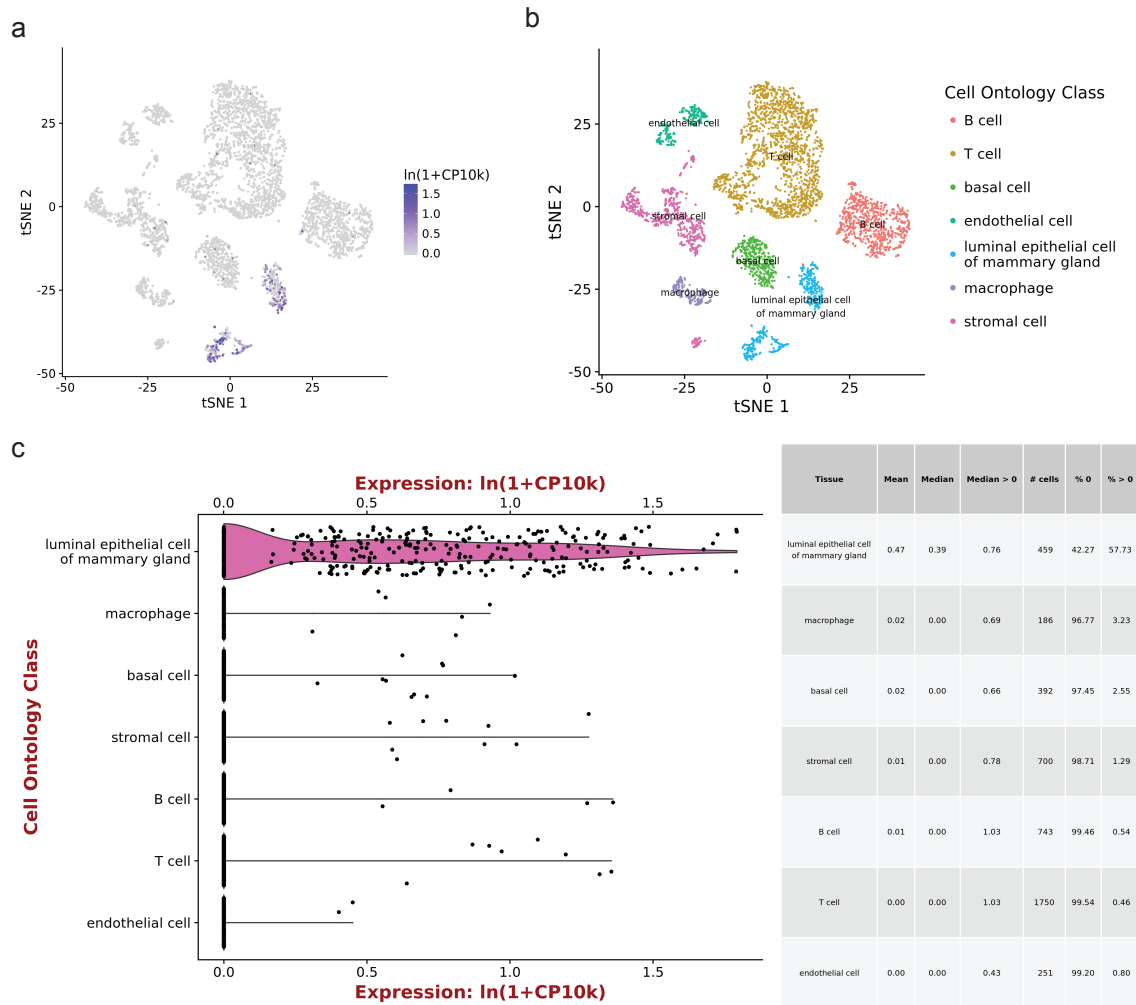

Figure 1. Single cell RNAseq (scRNAseq) of *Wnt7b* gene expression for all cell types in the mammary gland by Tabula Muris. A) tSNE plot displaying single cell *Wnt7b* gene expression in virgin mice superimposed on pre-defined cell clusters. Gene expression is normalised to 10,000 counts per cell. B) tSNE plot defining cell ontology of the cell clusters in A). C) Violin plot of *Wnt7b* gene expression in individual cells in the clusters defined in B). Gene expression is normalised to 10,000 counts per cell. Further relevant statistical values for each subpopulation are displayed in a table format.

All plots were generated at <https://tabula-muris.ds.czbiohub.org>

149

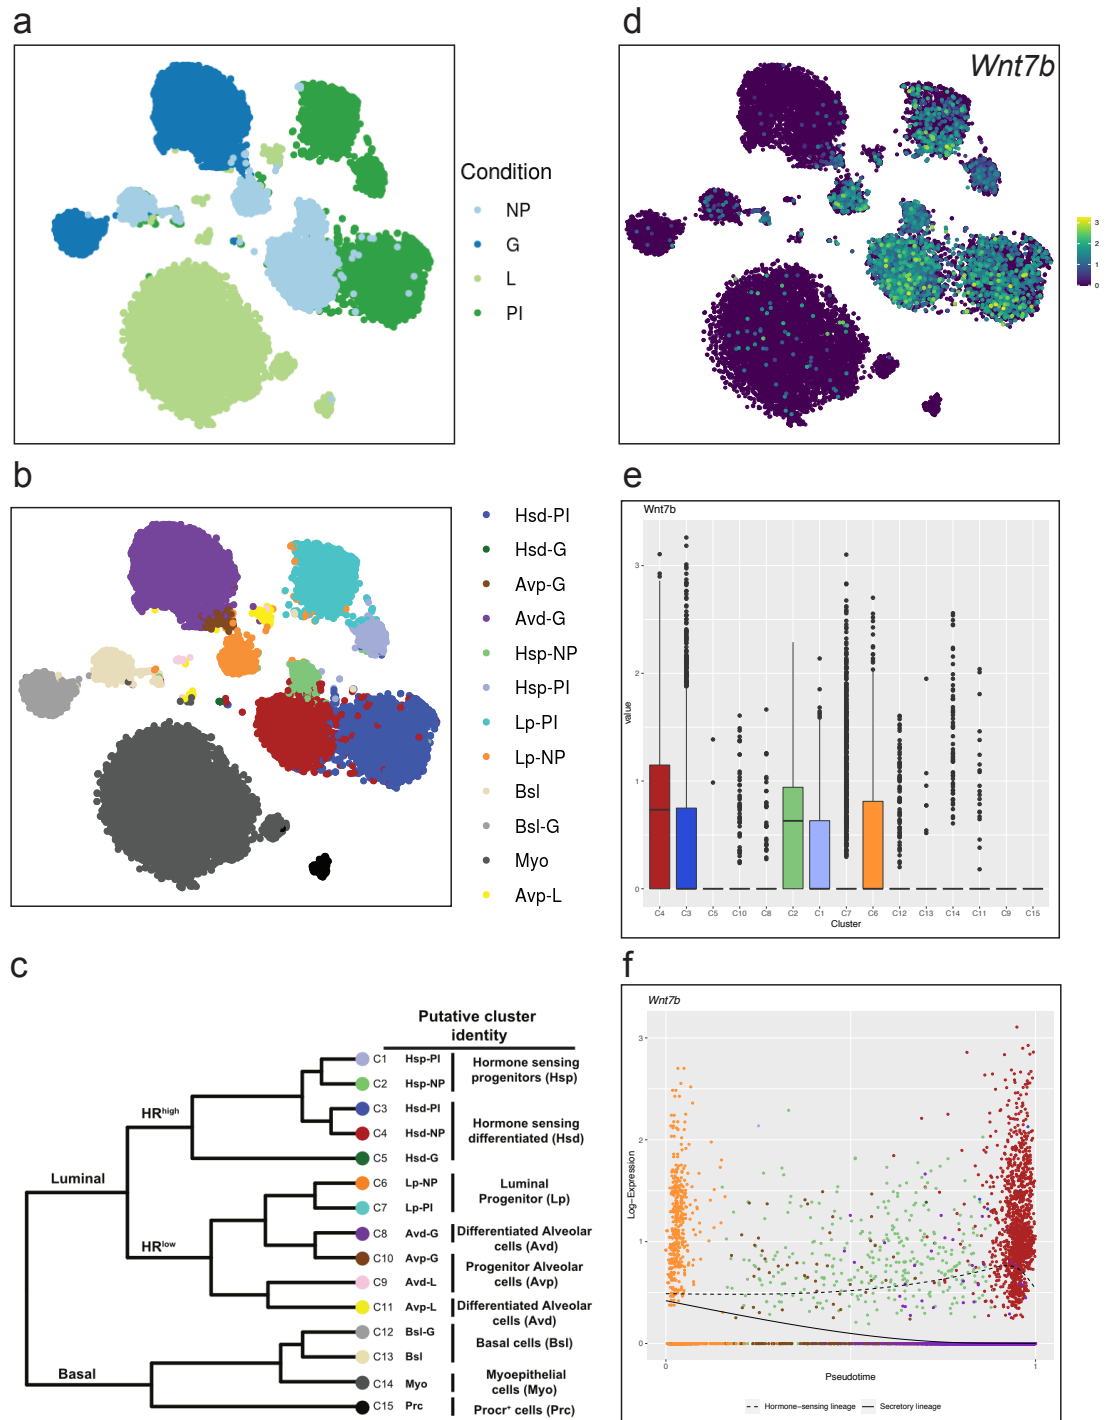

Figure 2. Single cell RNAseq (scRNAseq) of *Wnt7b* gene expression throughout mammary gland development A) tSNE plot displaying mammary gland developmental timepoints superimposed on pre-defined cell clusters. NP: Nulliparous, G: Gestation, L: Lactation, PI: Post-involution. B) tSNE plot defining cell ontology (through known marker genes) of cell clusters depicted in in A) & D). See C) for cell type classification. C) Dendrogram of clusters based on log transformed mean expression of 15 clusters. The tree was generated by Spearman's rank correlation with Ward linkage. D) tSNE plot of single cell *Wnt7b* gene log transformed mean expression superimposed on pre-defined clusters. E) Bargraphs of log transformed mean expression for each 15 clusters. F) Pseudotime trajectory of the single cell *Wnt7b* log transformed mean expression in the luminal lineage, displaying both the average expression in the hormone sensing and secretory lineages. Each dot represents an individual cell, and the color its associated cluster.

Plots were generated at <https://marionilab.cruk.cam.ac.uk/mammaryGland/>

150

151 From these analyses we would conclude that *Wnt7b* is expressed exclusively in the  
152 luminal compartment in the nulliparous mammary gland, is lost during pregnancy, and  
153 is re-established post-involution (fig3). Indeed, this is supported by other studies  
154 showing that *Wnt7b* is expressed in the virgin mammary gland, but drops at E12.5 of  
155 pregnancy to undetectable levels [7]. This underscores the validity of this approach  
156 and illustrates the usefulness of interactive *in silico* tools to determine spatiotemporal  
157 patterns of *in vivo* gene expression.

158

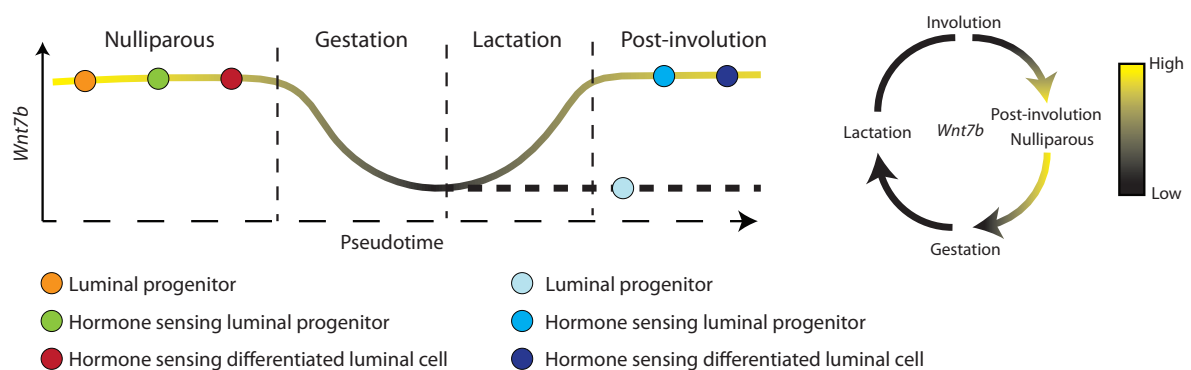

Figure 3. Graphic summary of mouse *Wnt7b* expression dynamics based on the scRNAseq data from Figure 1 and Figure 2. Drawn by the authors.

159

## 160 Identifying putative regulatory elements

161 Little is known about the molecular signals and cis-regulatory elements that  
162 control mouse *Wnt7b* or human *WNT7B* gene expression. In ER-/HER2+ breast  
163 tumors, *WNT7B* was shown to be a direct transcriptional target of the androgen  
164 receptor (AR) [17] and predicted to be regulated by Nuclear respiratory factor 1 (NRF1)  
165 [18]. Although *Wnt7b* is also expressed in hormone-responsive cells (fig2 and [13]), at  
166 present there is no experimental evidence to support that it is regulated by steroid  
167 hormones, in particular progesterone [19]. *Wnt7b* expression is not limited to the  
168 mammary gland, however. It is required for lung [20,21], and kidney development [22]  
169 to name but a few and can therefore be regulated by a myriad of signals.

170 One way to gain understanding into tissue-specific gene expression, is to  
171 identify cis-acting enhancer elements. Using ChIPseq analysis, a recent study  
172 predicted 440 mammary-specific super-enhancers [23]. Super-enhancers can be  
173 classified as dense clusters of transcriptional enhancers that are likely to control genes



174 important for cell type specification [23-25]. Only one of these was followed up in more  
175 detail in that particular study. However, a supplementary file listing all 440 of these  
176 putative regulatory elements is available. We were particularly intrigued by a sequence  
177 that spans more than 24 kb on chromosome 15 (published mm9 coordinates chr15:  
178 85475778-85500063, mm10 coordinates chr15: 85645348-85669633), which was  
179 assigned as a putative regulator of the nearest gene: *Wnt7b* (fig4a). While it is common  
180 to do so, linear proximity alone is not an accurate measure for functional interaction  
181 between an enhancer and its putative target gene [24,25]. Other genes in this region  
182 – including two miRNAs (*Mirlet7c-2/Mirlet7b*) and a protein coding gene (*Ppara*) –  
183 might also be regulated by this particular super-enhancer. A region on the edge of this  
184 super-enhancer (mm9 coordinates chr15:85473689-85478592, published mm10  
185 coordinates chr15: 85643259–85648162) was recently indeed associated with *Wnt7b*,  
186 albeit not in the mammary gland but in a mouse model for hair-follicle derived skin  
187 tumors, and based on strain-specific polymorphisms rather than on having been  
188 shown to directly regulate *Wnt7b* expression [14]. These results show that association  
189 of this super-enhancer with *Wnt7b* in the mammary gland is worthy of follow-up  
190 analysis.

191 The term “super-enhancer” is used to define a larger chromatin area that  
192 contains clusters of smaller, individual enhancers and that is enriched for active  
193 chromatin marks (e.g. H3K27ac) or occupied by transcriptional activators (e.g. MED1)  
194 and master regulatory transcription factors (e.g. STAT5A) [23,26,27]. More than  
195 80,000 super-enhancers (combined numbers for the mouse and human genome) can  
196 be accessed through the online dbSuper database [28]. An updated version of the  
197 Super Enhancer Archive (SEA 3.0) provides another entry point [29], but this database  
198 was unfortunately offline when we were drafting this manuscript (Supplementary Table  
199 1).

200 A first screen of the dbSuper database shows the tissue-specificity of super-  
201 enhancers: a putative *Wnt7b* super-enhancer has also been identified in the murine  
202 heart, lung and testis. However, this sequence does not overlap with the mammary-  
203 specific super-enhancer described by Shin et al. [23]. Instead, the dbSuper database  
204 predicts this particular location to contain two super-enhancers, identified in hair follicle  
205 stem cells, linked to *Mirlet7c-2/Mirlet7b* [30]. Additional super-enhancers in this region,  
206 identified in the kidney and the liver, are tentatively associated with *Ppara* (fig4b). It  
207 should be noted that also in dbSuper, super-enhancers and their associated genes

208 are linked based on a simply proximity rule to the nearest transcriptional start site  
 209 (TSS) [28]. Out of the genes located in this ~500 kb area on chromosome 15, only  
 210 *Atxn10* and *Wnt7b* show prominent expression in one or more mammary gland cell  
 211 subpopulations, although *Ppara*, *Mirlet7c-2/b* and a non-coding RNA, *Lncppara*, may  
 212 be differentially expressed at low levels (fig4c-e).  
 213

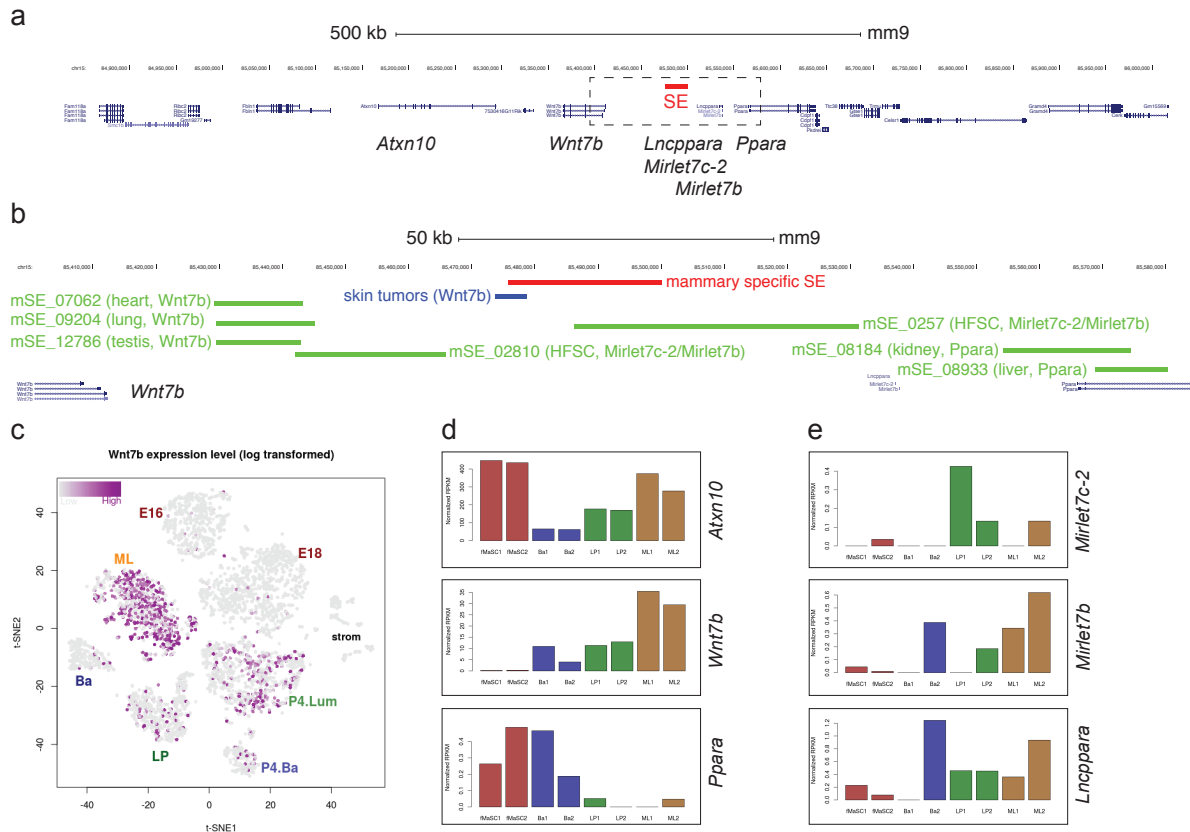

Figure 4. Overview of super-enhancers assigned to genes in the vicinity of *Wnt7b*. A) Location of a mammary-specific super-enhancer (SE, in red) on mouse chromosome 15. Scale bar is 500 kb. B) Close up of the region boxed in A. The mammary specific SE is shown in red. A *Wnt7b* associated regulatory region in skin tumors is highlighted in blue. Other super-enhancers in this genomic region, listed in Superdb, are depicted in green. The tissue of origin in which they were identified and the genes to which they have been associated based on proximity rules are indicated. HFSC= hair follicle stem cells. Scale bar is 50 kb. C) tSNE plot of single cell *Wnt7b* expression from FACS-based scRNAseq data from [31]. D) Gene expression of annotated genes in the vicinity of the mammary gland specific SE for all epithelial mammary gland subpopulations. E) Expression of putative non-coding RNAs in the vicinity of the mammary gland specific SE for all epithelial mammary gland subpopulations. D-E show normalized RPKM values. Plots for C-E were generated at [https://wahl-lab-salk.shinyapps.io/Mammary\\_snATAC/](https://wahl-lab-salk.shinyapps.io/Mammary_snATAC/)

214

## 215 Determining the boundaries of the *Wnt7b* regulatory domain

216 In recent years, it has become generally accepted that regulatory elements  
 217 control target gene expression within the confines of larger, structurally ordered  
 218 regions of the chromatin known as topologically associating domains (TADs) [32].

219 Specific DNA sequences (i.e. regulatory elements and their target genes) are much  
220 more likely to interact within a TAD, than across a TAD boundary. A logical next step  
221 in exploring the potential regulation of *Wnt7b* by the aforementioned mammary-  
222 specific super-enhancer would therefore be to determine the boundaries of the *Wnt7b*  
223 TAD.

224 We used the 3D Genome Browser (Box 2) to visualize TAD predictions of the  
225 *Wnt7b* locus using publicly available Hi-C datasets [33]. In this browser, TAD boundary  
226 predictions are calculated according to the so-called directionality index, which is a  
227 method that looks at the degree of up- and downstream interaction bias for DNA  
228 regions [34]. It was noted that DNA regions at the periphery of TADs are highly biased  
229 in their direction of interaction. Upstream regions in a TAD are highly biased towards  
230 interacting with downstream regions and vice versa. Using this directional bias, the  
231 boundaries of adjacent TADs can be predicted. Their coordinates are provided by the  
232 3D Genome Browser, which also includes an intuitive visual reference (fig5).

233

234 **Box 2: Chromatin conformation capture Hi-C data**

235

236 <http://promoter.bx.psu.edu/hi-c/>

237 *(built by the Yue lab, described in Wang et al. (2018), The 3D Genome Browser: a web-based browser for*  
238 *visualizing 3D genome organization and long-range chromatin interactions [33])*

239

240 The 3D Genome Browser compiles published Hi-C and capture Hi-C datasets from both mouse and human  
241 cell lines or tissues, including HMEC. Chromatin conformation data from the locus of a gene or location of  
242 interest can either be displayed as a Hi-C heatmap or as a virtual 4C (with the location of interest as  
243 viewpoint). Where applicable, it will predict the boundaries of local TADs based on the provided dataset.  
244 In the upper menu bar are several options for visualizing data: In “HiC” you can visualize the data from  
245 different papers/datasets. In “Compare HiC” you can compare TADs from two different datasets. The  
246 coordinates of different TADs can also be downloaded in text file format for hg19, hg38, mm9 and mm10.

247

248 Only one mammary-specific Hi-C dataset is currently available, derived from  
249 human mammary epithelial cells (HMEC) [35]. However, TADs have been reported to  
250 be stable across cell types and even species [34,36]. Although not all TAD boundaries  
251 are equally stable [37], TAD organization can therefore also be investigated using Hi-C  
252 datasets generated from a different tissue as input.

253 According to this analysis, the *Wnt7b* TAD boundary lies immediately upstream  
254 of the *Wnt7b* TSS in both HMECs and mouse lymphoma cells (fig5a,b). This would  
255 imply that the mammary-specific super-enhancer identified by Shin et al. lies outside  
256 of the predicted *Wnt7b* TAD, which makes it less likely that this particular super-  
257 enhancer directly regulates the expression of *Wnt7b*. However, in other Hi-C datasets  
258 this TAD boundary is less well defined (fig5c,d).  
259

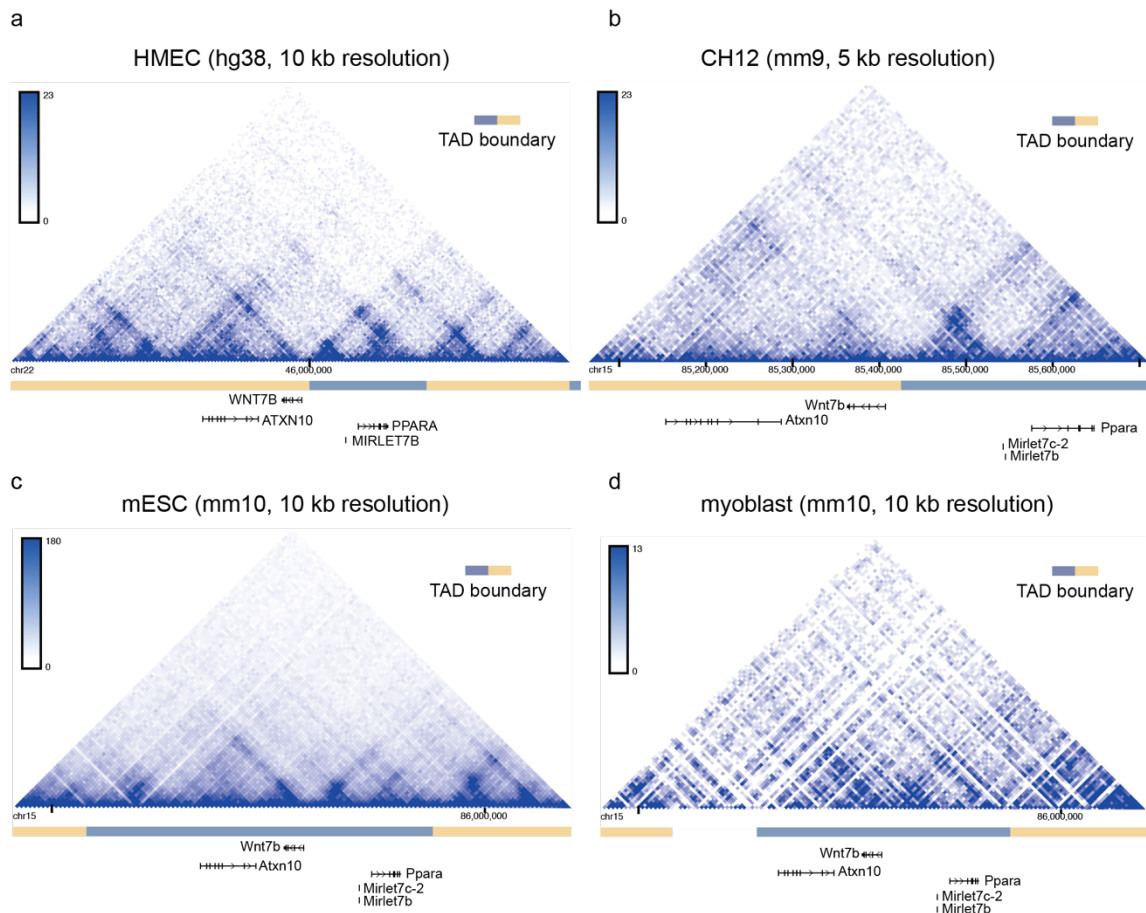

Figure 5. TAD boundary prediction using the 3D Genome Browser. In the depicted triangle, the physical interaction frequency of DNA regions is represented by the color intensity. A dark blue spot can be observed that connects the TAD boundaries of the predicted *Wnt7b* TAD, indicating that these genomic regions were found to frequently interact in this Hi-C dataset. Alternating beige and grey blocks (depicted in between the chromosome coordinates and the genes) depict individual TAD predictions. A) Hi-C data from human mammary epithelial cells, HMEC [35]. B) Hi-C data from mouse lymphoma cells, CH12 [35]. C) Hi-C data from mouse embryonic stem cells, mESC [38]. D) Hi-C data from mouse myoblasts [39]. Plots were generated at <http://promoter.bx.psu.edu/hi-c/>

260

## 261 **Discovering novel regulatory interactions**

262 To gain a better understanding of how the spatiotemporal expression of *Wnt7b*  
263 is regulated in the adult mammary gland, we can start by probing the epigenetic state

264 of the *Wnt7b* locus in an R shiny app published by the Wahl lab (Box 3). This tool not  
265 only allows chromatin accessibility and relevant histone modifications to be examined,  
266 but also can be used to make predictions about specific promoters and their regulatory  
267 sequences of interest. An attractive graphical interface allows intuitive interpretation  
268 of the data (fig6).

269

### 270 **Box 3: Probing chromatin accessibility and epigenetic interactions**

271

272 [https://wahl-lab-salk.shinyapps.io/Mammary\\_snATAC/](https://wahl-lab-salk.shinyapps.io/Mammary_snATAC/)

273 (Chung et al., 2019, *Cell Reports* [40] & Dravis et al., 2018, *Cancer Cell* [41]).

274

275 The R shiny app published by the Wahl lab combines bulk RNAseq and H3K27 acetylation ChIPseq data from [41]  
276 with single-nucleus ATACseq (snATACseq) and scRNAseq data from [40] in an online web interface that allows  
277 its users to investigate numerous (epi)-genetic feature in fetal mammary stem cells (E18 fMaSCs), basal, luminal  
278 progenitor and mature luminal cells. This allows researchers to investigate single cell expression & chromatin  
279 state (accessibility in the case of snATACseq and active enhancer marks in the case of H3K27Ac ChIPseq) of their  
280 gene of interest, and to follow expression of the gene along a pseudotime trajectory. Moreover, if this gene is a  
281 transcription factor, its activity can be predicted for each subpopulation based on motif enrichment in open  
282 chromatin regions from snATACseq data. Lastly, based on co-accessibility of distal sites and promoter regions in  
283 single cells promoter-enhancer interactions for the gene of interest can be predicted using the so-called Cicero  
284 algorithm [42], and concurrently displayed with chromatin accessibility scores and H3K27Ac from aggregate  
285 snATACseq and bulk ChIPseq data. In the online tool, Cicero makes predictions in a region of max. 300 kb (with  
286 150 kb upstream and 150 kb downstream of the viewpoints).

287

288 If we focus our attention on the *Wnt7b* promoter and gene region (i.e. the center  
289 portion of fig6), snATACseq reveals that the chromatin is relatively accessible in all  
290 mammary cell type subpopulations irrespective of *Wnt7b* gene expression levels (fig6,  
291 top 5 rows). In contrast, H3K27ac of the *Wnt7b* promoter and gene region is  
292 exclusively enriched in the luminal compartment (fig6, bottom 4 rows in red). This  
293 suggests that *Wnt7b* is 'primed' and open in all epithelial cells in the mammary gland,  
294 but its potential for increased gene expression is only realized in the luminal  
295 compartment where the chromatin displays the proper histone acetylation marks.

296 Combining the Cicero algorithm (see Box 3) with snATACseq data, this online  
297 tool can also be used to infer co-accessibility of distal sites and the promoter of their  
298 putative genes in individual cells. In this manner, Cicero can predict cis-regulatory



299 elements that would be able to interact with the *Wnt7b* promoter *in vivo*. At a co-  
300 accessibility threshold of 0.15, Cicero identifies 10 regions within 150 kb up- or  
301 downstream of the viewpoint that interact with the promoter of *Wnt7b*. Of these, 4 are  
302 located upstream of *Wnt7b* in an area dense with H3K27ac that encompasses, but  
303 extends beyond, the super-enhancer region, and 6 are located downstream of *Wnt7b*  
304 (fig6).

305 The interacting regions depicted to the left of the *Wnt7b* promoter (regions 1-6,  
306 located 3' distal to the TSS) all fall within in the predicted *Wnt7b* TAD (compare fig5,6).  
307 These distal sites are either somewhat enriched for chromatin accessibility or  
308 H3K27ac, or a combination of both epigenetic features, in adult luminal progenitor and  
309 mature luminal cells compared to the adult basal subpopulation (fig6,7). The 4 regions  
310 downstream of *Wnt7b* (7-10) do not display evident changes in chromatin accessibility  
311 or H3K27ac when luminal cells are compared to the basal compartment, except for  
312 region 8 (fig6,7). Note that the distance between region 9 and 10 spans more than 60  
313 kb, which is considerably larger than the reported size of the mammary-specific super-  
314 enhancer. This entire stretch of 60 kb shows characteristic marks of active and open  
315 chromatin, suggesting that a much larger collection of regulatory elements may exist  
316 in this area (fig6).

317

318

319

320

Next page:

Figure 6. Overview of chromatin accessibility, genomic interactions and the epigenetic status of the *Wnt7b* locus.

Top) Regions identified by Cicero as having a higher co-accessibility score than 0.15 are displayed as interacting loops with the *Wnt7b* promoter. The height of the loop indicated the corresponding Cicero score. The viewpoint size at the promoter is a stretch of 1000 bp. Middle) The 4 snATAC tracks display the aggregated snATAC signal from [40] at the *Wnt7b* locus for each epithelial mammary gland subpopulation. Ba-like: Basal-like, LP: Luminal Progenitor, ML: Mature Luminal. Bottom) The 4 H3K27 acetylation tracks display bulk ChIPseq of FACS sorted cells from [41] at the *Wnt7b* locus for each epithelial mammary gland subpopulation. ML\_H3K27ac: Mature Luminal, LP\_H3K27ac: Luminal Progenitor, Ba\_H3K27ac: Basal, f\_H3K27ac: fetal. All the data is aligned to mm10 and displayed in a window size of 300 kb. Note that *Wnt7b* is oriented in the reverse orientation (i.e. expressed from the minus strand). Regulatory regions 1-6 to the left of *Wnt7b* are therefore downstream of the promoter and regions 7-10 to the right of *Wnt7b* are upstream. Distal elements that are predicted to interact with the *Wnt7b* promoter and alter their epigenetic status in accordance to *Wnt7b* expression can have the potential to be involved in the spatial temporal regulation of *Wnt7b* in the mammary gland and therefore warrant further investigation. The shiny app offers an intuitive and interactive visual tool to quickly compare numerous epigenetic features, and identify novel regions of interest. It should be noted that no statistical analysis or specific coordinates are provided, although these are available in supplementary data and the GEO accession file. Hence, it serves as an excellent hypothesis generating tool that requires further validation either by *in silico* analysis or experimentation.

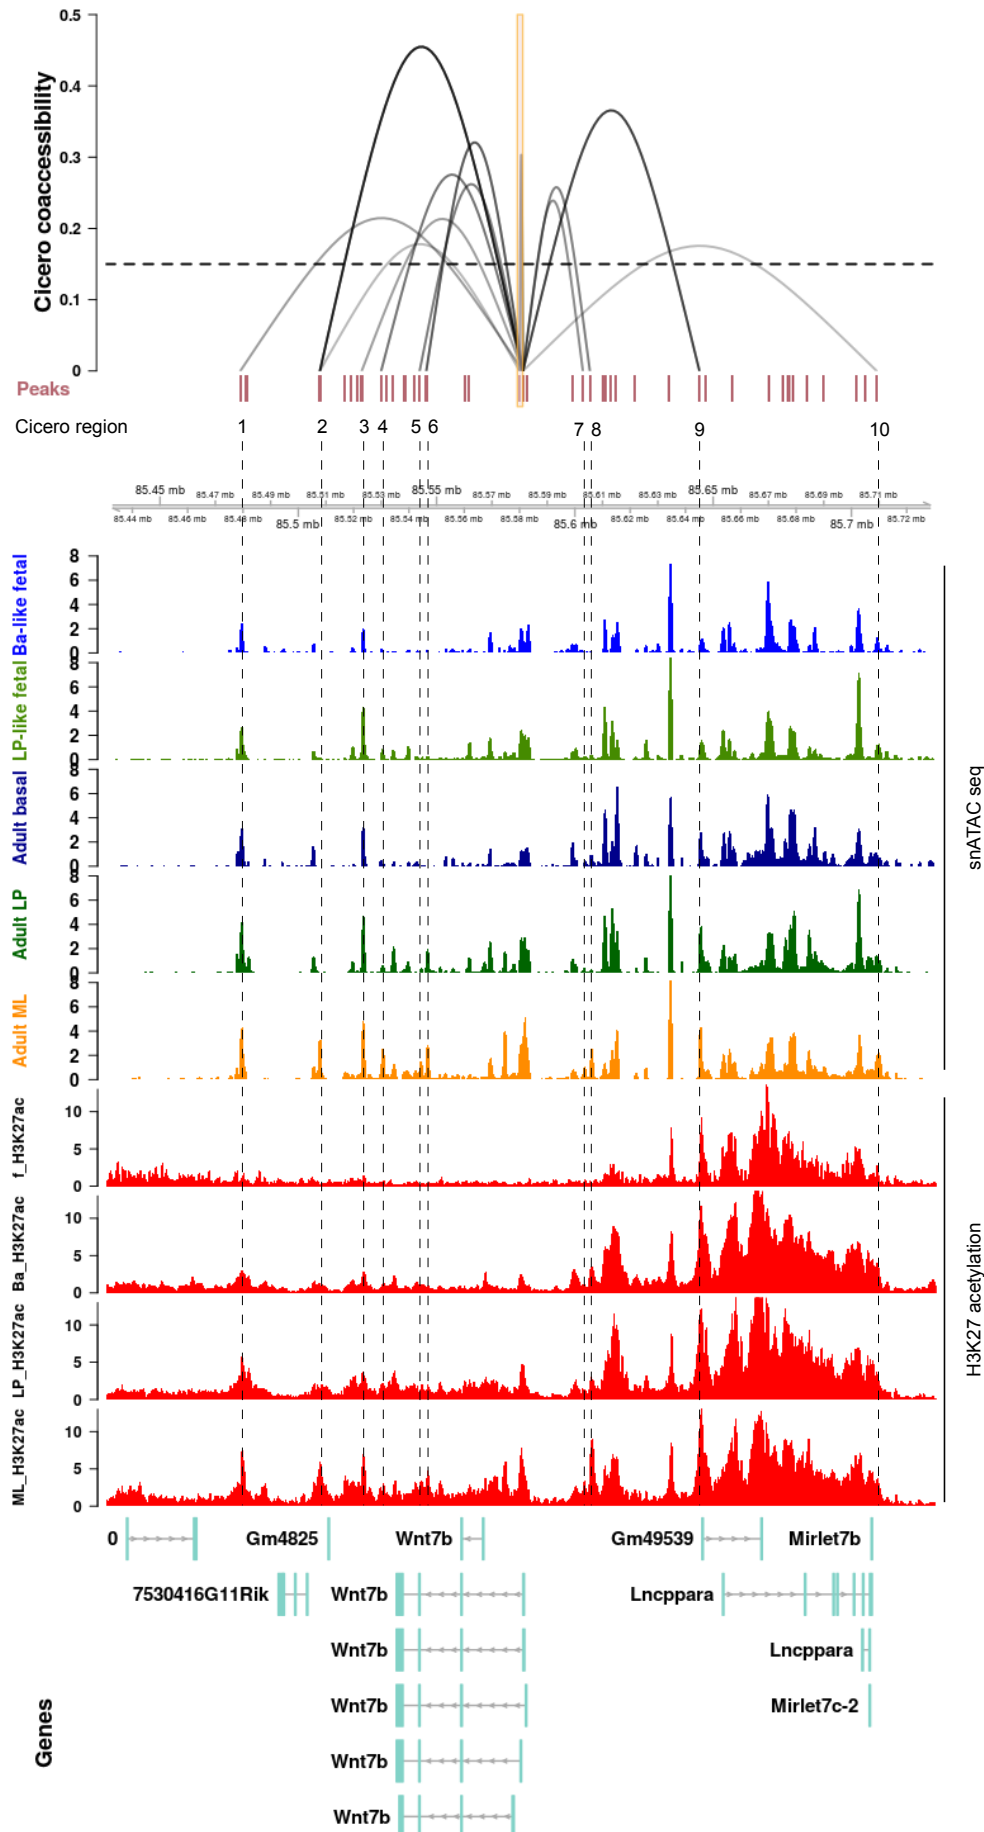

| Region | Cicero score | snATAC >2 |       |                    |                | H3K27ac >5 |       |                    |                |
|--------|--------------|-----------|-------|--------------------|----------------|------------|-------|--------------------|----------------|
|        |              | Fetal     | Basal | Luminal Progenitor | Mature Luminal | Fetal      | Basal | Luminal Progenitor | Mature Luminal |
| 1      | > 0.2        | +         | +     | +                  | +              | -          | -     | +                  | +              |
| 2      | > 0.4        | -         | -     | -                  | +              | -          | -     | -                  | +              |
| 3      | > 0.2        | +         | +     | +                  | +              | -          | -     | -                  | +              |
| 4      | > 0.25       | -         | -     | -                  | +              | -          | -     | -                  | -              |
| 5      | > 0.25       | -         | -     | -                  | -              | -          | -     | -                  | -              |
| 6      | > 0.3        | -         | -     | +                  | +              | -          | -     | -                  | -              |
| 7      | > 0.2        | -         | -     | -                  | -              | -          | -     | -                  | -              |
| 8      | > 0.25       | -         | -     | -                  | +              | -          | -     | -                  | +              |
| 9      | > 0.35       | -         | +     | +                  | +              | +          | +     | +                  | +              |
| 10     | > 0.15       | -         | -     | -                  | +              | -          | -     | -                  | -              |

Figure 7. Summary of the epigenetic features of each region identified by Cicero as depicted in Figure 6. Somewhat high(er) levels of snATAC seq signal are defined above a cut-off of 2 and H3K27 acetylation above a cutoff of 5. Note that the tool does not offer any statistical analysis, and therefore cut-offs were user-defined compared to the total signal in the 300 kb window. They should thus be considered reasonable, but relatively arbitrary and worthy of more in-depth investigation.

321

322 **Box 4: Looking for evolutionary conservation**

323

324 <http://ecrbrowser.dcode.org>

325 (*Ovcharenko et al., 2004, Nucleic Acids Research* [43]).

326

327 This web-based tool enables access to pairwise alignments for the genomes of 13 species and visualizes  
 328 evolutionary conserved regions (ECRs) in a graphical interface. Users can set their own parameters to select  
 329 regions with a desired cut-off (in figure 8: >85% sequence identity over >200 bp). Sequences that are conserved  
 330 within these chosen parameters are represented as colored peaks. Conservation between species is shown  
 331 relative to a base genome of choice (in figure 8: Hg19). Sequence information from the UCSC Genome Browser  
 332 (<http://genome.ucsc.edu/>) [44] can be extracted when selecting the DNA region of interest.

333 Genome assemblies used in the ECR browser: human: Hg19, Tetraodon: tetNig1, frog: xenTro3, fugu: fr3,  
 334 zebrafish: danRer7, chicken: galGal3, opossum: monDom5, rat: rn4, mouse: mm10, cow: bosTau6, dog:  
 335 canFam2, chimpanzee: panTro3, rhesus macaque: rheMac2.

336

337

338 **Exploring conservation of putative regulatory enhancer sequences**

339 In previous studies, highly conserved sequences were associated with  
 340 developmental and transcriptional regulators [45–51]. Given the fundamental role of  
 341 Wnt signaling not only in vertebrate development [52], but also specifically in



342 mammary gland development and maintenance [53–55], focusing on conserved  
 343 sequences could be another criteria for the selection of candidate *Wnt7b* enhancers.  
 344 To identify conserved regions in the vicinity of *Wnt7b*, we used the evolutionary  
 345 conserved region (ECR) browser (Box 4).  
 346

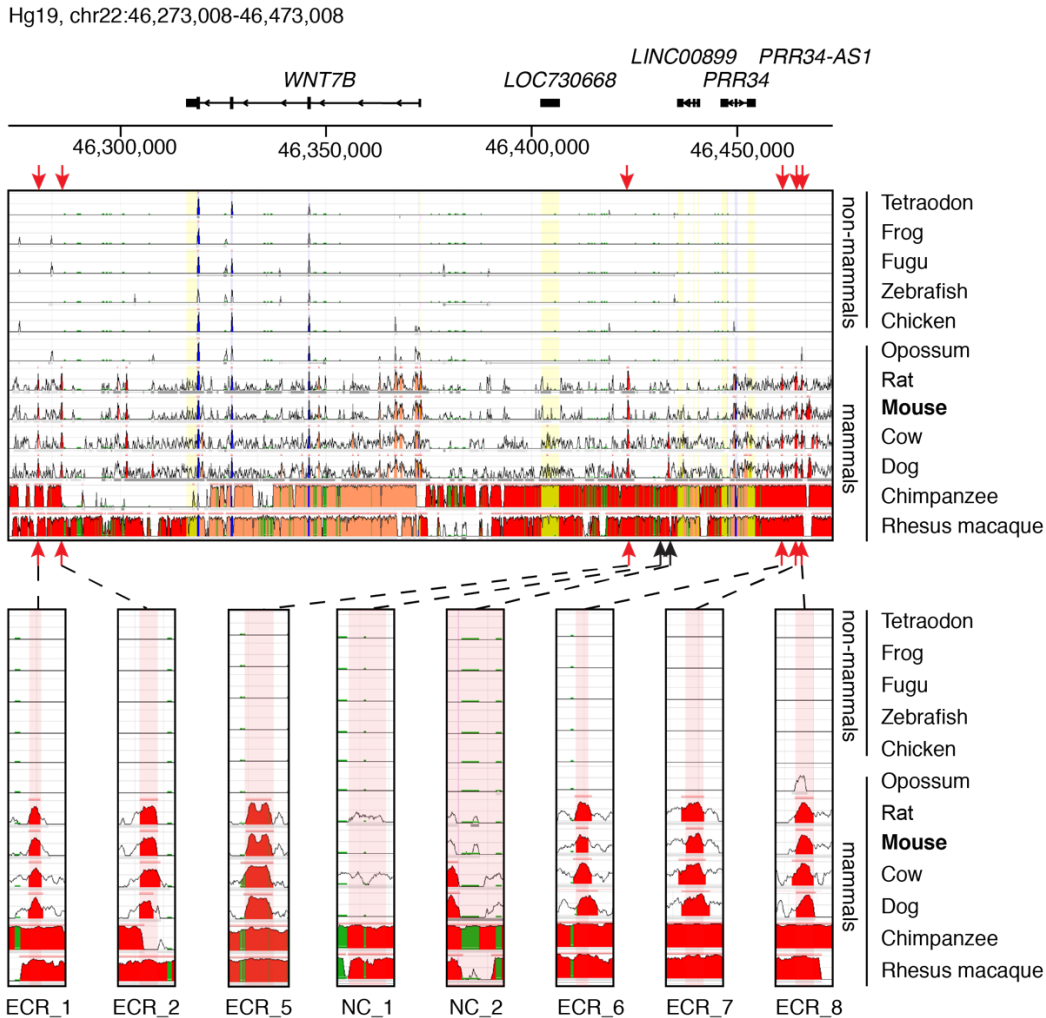

Figure 8. Selection of candidate enhancers based on sequence conservation. A 200 kb region of the human Hg19 genome assembly, 100 kb up- and downstream of *WNT7B* TSS. In each track the sequence conservation between Hg19 and one of 12 vertebrates is shown. Different colors indicate the following: Red = intergenic, salmon = intragenic, yellow = UTRs, blue = coding sequences, green = transposons and simple repeats. Locations of putative candidate *Wnt7b* enhancers are indicated by red arrows. Lower panels show zoomed in regions of 1000 bp where the candidate enhancers are located. The red shade over the tracks represent the chosen candidate enhancer region. Examples of sequences that are conserved in mammals, but not in non-mammalian vertebrates are shown (ECR\_1, ECR\_2, ECR\_5, ECR\_6, ECR\_7 and ECR\_8) alongside two examples of a non-conserved region (NC\_1, NC\_2). Parameters used: >85% sequence identity over >200 bp.

347  
 348 Often, conservation is scored across vertebrate species. However, in an  
 349 attempt to identify regions that are specifically conserved in mammals, we specifically  
 350 selected candidate sequences in a region of ~100 kb up- and downstream of the  
 351 *Wnt7b* TSS that are conserved across mammalian, but not necessarily in non-  
 352 mammalian vertebrate species available in the ECR browser (fig8).

353

## 354 **A working model for follow-up studies**

355 Of course, none of these approaches (sequence conservation, histone  
356 modification, transcription factor ChIPseq), either by themselves or in combination, are  
357 sufficient to definitively link any of these putative regulatory elements to *Wnt7b*. This  
358 requires further experimental validation and specific follow up. However, as a  
359 prediction tool these combined analyses provide an excellent starting point for  
360 dissecting this super-enhancer in more detail. If we put all of the different pieces of  
361 information together (fig9), we can draft some hypotheses regarding the regulation of  
362 *Wnt7b* expression in the mammary gland.

363 First, we propose that in mammary epithelial cells the proposed TAD boundary  
364 immediately upstream of *Wnt7b* (fig5) is not very stable, given that the Cicero  
365 algorithm predicts four interactions between the *Wnt7b* promoter and regions to the  
366 right of this presumed TAD boundary (i.e. regions 7-10 in fig6). Of note, two of these  
367 interactions (Cicero regions 7 and 8) occur in the direct vicinity of this presumed TAD  
368 boundary. The other two interactions (Cicero regions 9 and 10) border a large area of  
369 active chromatin, which extends beyond the super-enhancer region previously  
370 identified by Shin et al. [23]. It has not escaped our attention that this 60 kb area  
371 harbors an annotated lncRNA (*Lncppara*) and two microRNAs, *MirLet7b/MirLet7c-2*,  
372 which are broadly expressed and implicated in cancer formation [56–58]. Moreover,  
373 this region also contains multiple conserved sequences that could represent functional  
374 enhancer elements (including ECR\_6, ECR\_7 and ECR\_8 from fig8).

375 Second, if we do take the TAD boundary prediction into account, it may be wise  
376 to prioritize the interactions that occur between *Wnt7b* and more downstream  
377 sequences (i.e. regions 1-6 in fig6). Although the coordinates from the Cicero  
378 prediction algorithm deserve further scrutiny of the original datasets, these  
379 downstream interacting regions also lie in close vicinity to conserved sequence  
380 elements.

381 Third, in combination with the expression data analysis (fig1,2), the published  
382 literature and the active enhancer marks (fig6,7), we can make a further prioritization  
383 of putative *Wnt7b* enhancer sequences that are worthy of experimental validation and  
384 follow up. In this case, region 2 is particularly interesting as it has the highest Cicero  
385 score and displays both differential chromatin accessibility and H3K27 acetylation in  
386 the luminal compartment.

387 To summarize, by using publicly available online tools we assessed the  
388 genomic conformation of the *Wnt7b* locus, and how this relates to the previously  
389 identified putative *Wnt7b* super enhancer. By examining the epigenetic status of the  
390 *Wnt7b* locus more closely, we noticed that although the *Wnt7b* promoter is predicted  
391 to interact with the super-enhancer region, this is likely not cell type specific as both  
392 chromatin accessibility and H3K27ac do not change between the basal and luminal  
393 lineages in this region. However, regions downstream of *Wnt7b* do change their  
394 epigenetic status in accordance to *Wnt7b* gene expression and are also predicted to  
395 interact with the *Wnt7b* promoter. This entire area would be worthy of experimental  
396 follow up to definitively associate specific regulatory elements with *Wnt7b* and/or other  
397 nearby genes – in particular the miRNAs and *Ppara*.  
398

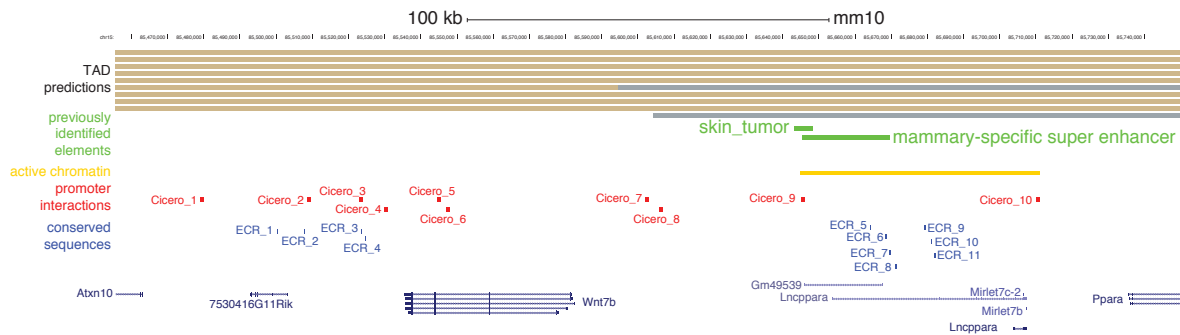

Figure 9. Integration of the insights obtained from the different analyses. Beige and grey bars at the top represent neighboring TADs as predicted in cortex (liftover from mm9), mESC (liftover from mm9), neurons (mm10), mESC (mm10), NPC (mm10), CH12 (liftover from mm9), cortical neurons (mm10), myoblast (mm10), G1E-ER4 (mm10) and HMEC (liftover from human). Previously identified (super) enhancer elements are depicted in green, the region of active chromatin identified in the Cicero analysis is depicted in yellow, promoter interactions predicted by Cicero are depicted in red and conserved sequences identified in the ECR browser are depicted in blue. Coding and non-coding genes are shown at the bottom for reference.

399

## 400 Discussion

401 Using publicly available genome wide datasets and accessible online tools, we have  
402 identified several regions that might play a role in the regulation of spatiotemporal  
403 expression of *Wnt7b* in the mouse mammary gland is regulated. Our main goal was  
404 to show the reader how these findings provide additional information for future  
405 investigations. However, we also want to use this opportunity to highlight and stress  
406 the added value of making large datasets available to a wide audience through  
407 interactive online tools. We thank our colleagues who invest their resources to do so.  
408 At the same time, we call for joint efforts from our community to ensure that the  
409 repertoire of tools as well as of accessible datasets continues to grow and remains of

410 high quality and value to investigators worldwide. As others have undoubtedly noticed,  
411 mammary gland and breast tissue datasets are often notoriously absent from public,  
412 large-scale -omics efforts. Generating and curating additional genome wide datasets  
413 (e.g. Hi-C and others) for both epithelial and stromal cells of multiple species, including  
414 mouse and human, would be a tremendous resource for our community as a whole.  
415 The careful generation of such datasets in combination with user-friendly online tools  
416 provide a valuable resource for researchers, and could in the long run also help to  
417 reduce animal experimentation. Certain features will enhance the user experience and  
418 promote the wide use of such tools, including the ability to export high resolution  
419 graphs (ideally allowing further customization, e.g. PDF format as offered by [15,33])  
420 and the ability to easily download specific sequences or genome coordinates (as  
421 offered by [33,43]). Given the challenges associated with keeping these databases up  
422 to date and operating smoothly, international and consortium efforts that provide  
423 sufficient support infrastructure may, in the long term, prove to be essential in this  
424 regard.

425 Here we have shown how the combined use of different online tools can be applied to  
426 generate novel hypotheses. Of course, the same tools can also be used to  
427 complement existing projects by providing additional data. Ideally, in the not too near  
428 future, researchers will have a broad compendium of resources available to them that  
429 are of such high quality that they will allow *in vivo* analyses to be performed *in silico*,  
430 thereby bringing such genome-wide analyses within reach of all scientists. This will  
431 only be possible, however, if sufficient tissue-specific datasets can be accessed.  
432 Especially in the case of the mammary gland, great care should be taken to include  
433 different timepoints to cover both embryonic and postnatal developmental stages, as  
434 well as the entire gestational cycle. Here, biological and computational expertise will  
435 continually need to go hand in hand to ensure that such online tools can meet the  
436 demands of the scientific questions that are being asked.

437

438

439

#### 440 **Author contributions**

441 Conceptualization: YBCvdG, RvA; Methodology/Experiment design: YBCvdG, NH,  
442 RvA; Investigation/Data acquisition: YBCvdG, NH, RvA; Formal analysis/Data  
443 interpretation: YBCvdG, NH, RvA; Writing – original draft: YBCvdG, NH, RvA; Writing

444 – revision and editing: YBCvdG, NH, RvA; Visualization: YBCvdG, NH, RvA;  
445 Supervision: RvA; Approval final manuscript: YBCvdG, NH, RvA; Project  
446 administration/Stewardship: YBCvdG, RvA; Funding acquisition: RvA.

447

448 **Funding statement**

449 This work was supported by a an NWO-ALW VIDI grant from the Dutch Research  
450 Council (864.13.002, to RvA).

451

452 Supplementary Table 1. Compilation of publicly available online tools that are outside the scope of the current case study. These  
 453 tools are not specific for mammary gland biology and/or do not always include mammary gland datasets.

454

| Tool                                                                                                  | Description                                                                                                                                                                                                                                                                                                                                                                                                                                                                                                                                                                                                                                                                                                                                        | Reference |
|-------------------------------------------------------------------------------------------------------|----------------------------------------------------------------------------------------------------------------------------------------------------------------------------------------------------------------------------------------------------------------------------------------------------------------------------------------------------------------------------------------------------------------------------------------------------------------------------------------------------------------------------------------------------------------------------------------------------------------------------------------------------------------------------------------------------------------------------------------------------|-----------|
| <a href="http://asntech.org/dbsuper/index.php">http://asntech.org/dbsuper/index.php</a>               | dbSuper is an interactive database containing more than 80,000 putative super enhancers for 25 mouse and >100 human tissues and cell lines. The database has migrated from its original reported location ( <a href="http://bioinfo.au.tsinghua.edu.cn/dbsuper/">http://bioinfo.au.tsinghua.edu.cn/dbsuper/</a> ) and while functional and highly intuitive, it is not clear whether it has been updated since 2017.                                                                                                                                                                                                                                                                                                                               | [28]      |
| <a href="http://sea.edbc.org">http://sea.edbc.org</a>                                                 | SEA version 3.0 was updated in 2019 and promises to be a comprehensive resource that stores predicted super-enhancers and enhancers from 11 different species and more than 200 types of cells, tissues and diseases.                                                                                                                                                                                                                                                                                                                                                                                                                                                                                                                              | [29]      |
| <a href="https://tabula-muris-senis.ds.czbiohub.org/">https://tabula-muris-senis.ds.czbiohub.org/</a> | A large compendium of single cell transcriptome data from the model organism <i>Mus musculus</i> that contains scRNAseq datasets of 23 organs and tissues, including the mammary gland at 6 different timepoints (1 month, 3 months, 18 months, 21 months, 24 months, 30 months). This online dataset explicitly includes stromal cells and other cell types from the supportive tissue (e.g. endothelial and immune cells). Of note, all tissues have been processed and analysed by two different protocols: cells were either FACS sorted, or single-cell sorted using microfluidic droplet-capture techniques and thus sequenced using two different methodologies, providing an innate technical validation of the data when using this tool. | [59]      |
| <a href="https://twc-stanford.shinyapps.io/mac/">https://twc-stanford.shinyapps.io/mac/</a>           | Also part of the Tabula Muris Senis effort. Offers extensive statistical analysis and visualization of bulk RNA seq datasets from 17 organs of <i>Mus musculus</i> at 10 different timepoints.                                                                                                                                                                                                                                                                                                                                                                                                                                                                                                                                                     | [60]      |
| <a href="https://www.kobic.kr/3div/">https://www.kobic.kr/3div/</a>                                   | 3DIV collects human Hi-C data from 80 cells lines or tissues (including HMEC, MCF7, MCF10A) and promoter capture Hi-C from 27 tissues. Chromatin conformation data from the locus of a gene or location of interest can be either displayed as a Hi-C heatmap and as a virtual 4C (with the location of interest as viewpoint). If applicable, it also predicts the boundaries of local TADs based on the provided datasets. 3DIV offers more flexibility to its users as it allows the user to select the algorithm                                                                                                                                                                                                                               | [61,62]   |

|                                                                                                                           |                                                                                                                                                                                                                                                                                                                                                                                                                                                                                            |         |
|---------------------------------------------------------------------------------------------------------------------------|--------------------------------------------------------------------------------------------------------------------------------------------------------------------------------------------------------------------------------------------------------------------------------------------------------------------------------------------------------------------------------------------------------------------------------------------------------------------------------------------|---------|
|                                                                                                                           | used to predict TADs, define the cut-off for positive interactions in the virtual 4C and it is straightforward to extract the coordinates of positive hits.                                                                                                                                                                                                                                                                                                                                |         |
| <a href="https://www.ebi.ac.uk/xa/sc/home">https://www.ebi.ac.uk/xa/sc/home</a>                                           | Single Cell Expression Atlas & Gene Expression Atlas: A database that compiles and visualizes published RNA & scRNA-seq datasets from Human, Mouse & a wide variety of model organisms. Selected datasets are plotted as a tSNE, and a heatmap highlighting marker genes for each annotated cluster is displayed. The database can be searched by gene across species, experiments, tissues and cell lines to reveal where this gene is expressed.                                         | [63]    |
| <a href="http://bioinfo.vanderbilt.edu/AE/HACER/">http://bioinfo.vanderbilt.edu/AE/HACER/</a>                             | <b>HACER</b> is an atlas of <b>H</b> uman <b>A</b> ctive <b>E</b> nhancer to interpret <b>R</b> egulatory variants, which includes active, transcribed enhancers derived from GRO-seq, PRO-seq and CAGE data. HACER not only compiles cell type specific enhancers but also integrates transcription factor-enhancer binding prediction, validated chromatin interactions and links GWAS SNPs and eQTL variants to enhancer regions. The database includes the MCF10A and MCF7 cell lines. | [64]    |
| <a href="https://www.spatialomics.org/SpatialDB/">https://www.spatialomics.org/SpatialDB/</a>                             | An online database that compiles published spatial transcriptomic datasets and offers a web interface for spatially resolved transcriptomic data visualisation and comparison. Includes a human breast cancer dataset.                                                                                                                                                                                                                                                                     | [65]    |
| <a href="http://uofuhealth.utah.edu/huntsman/labs/spike/d3.php">http://uofuhealth.utah.edu/huntsman/labs/spike/d3.php</a> | tSNE visualisation of gene expression during mammary gland development: from E16 to Adult.                                                                                                                                                                                                                                                                                                                                                                                                 | [31]    |
| <a href="https://panqlaodb.se/index.html">https://panqlaodb.se/index.html</a>                                             | PanglaoDB is a database that collects and integrates scRNAseq data from human and mouse and presents them through an unified framework.                                                                                                                                                                                                                                                                                                                                                    | [66]    |
| <a href="http://bis.zju.edu.cn/MCA/index.html#">http://bis.zju.edu.cn/MCA/index.html#</a>                                 | Mouse cell atlas: A scRNAseq atlas that visualizes scRNAseq from a wide variety of mouse tissues.                                                                                                                                                                                                                                                                                                                                                                                          | [67]    |
| <a href="https://www.cbioportal.org/">https://www.cbioportal.org/</a>                                                     | An open platform for exploring multidimensional cancer genomics data, including breast cancer. Allows you to search for mutations, CNV etc. of your gene of interest and compare this between sets.                                                                                                                                                                                                                                                                                        | [68,69] |
| <a href="http://www.enhanceratlas.org/indexv2.php">http://www.enhanceratlas.org/indexv2.php</a>                           | The database provides enhancer annotation in nine species, including human (hg19), mouse (mm9), fly (dm3), worm (ce10), zebrafish (danRer10), rat (rn5), yeast (sacCer3), chicken (galGal4), and boar                                                                                                                                                                                                                                                                                      | [70,71] |

|                                                                                                   |                                                                                                                                                                                                                                                                                                        |         |
|---------------------------------------------------------------------------------------------------|--------------------------------------------------------------------------------------------------------------------------------------------------------------------------------------------------------------------------------------------------------------------------------------------------------|---------|
|                                                                                                   | (susScr3). The consensus enhancers were predicted based on multiple high throughput experimental datasets (e.g. histone modification, CAGE, GRO-seq, transcription factor binding and DHS). This database includes the HMEC cell line.                                                                 |         |
| <a href="https://apps.kaessmannlab.org/evodevoapp/">https://apps.kaessmannlab.org/evodevoapp/</a> | A database visualized by an intuitive shiny app that allows for an interactive exploration of gene expression profiles across tissues, developmental stages and species. This does not only include protein coding genes but also putative LncRNAs. The mammary gland is not included in this dataset. | [72,73] |

455



## 456 **References**

457

- 458 1. Misra BB, Langefeld C, Olivier M, Cox LA. Integrated omics: tools, advances and future  
459 approaches. *J Mol Endocrinol* [Internet]. 2019 [cited 2020 Jul 23];R21–45. Available from:  
460 <https://jme.bioscientifica.com/view/journals/jme/62/1/JME-18-0055.xml>
- 461 2. Van De Moosdijk AAA, Van Amerongen R. Identification of reliable reference genes for  
462 qRT-PCR studies of the developing mouse mammary gland. *Sci Rep* [Internet].  
463 2016;6:35595. Available from: <http://www.nature.com/articles/srep35595>
- 464 3. Huguet EL, McMahon JA, McMahon AP, Bicknell R, Harris AL. Differential Expression of  
465 Human Wnt Genes 2, 3, 4, and 7B in Human Breast Cell Lines and Normal and Disease  
466 States of Human Breast Tissue. *Cancer Res*. 1994;54:2615–21.
- 467 4. Milovanovic T, Planutis K, Nguyen A, Marsh JL, Lin F, Hope C, et al. Expression of Wnt  
468 genes and frizzled 1 and 2 receptors in normal breast epithelium and infiltrating breast  
469 carcinoma. *Int J Oncol*. 2004;25:1337–42.
- 470 5. Chen J, Liu T-Y, Peng H-T, Wu Y-Q, Zhang L-L, Lin X-H, et al. Up-regulation of Wnt7b  
471 rather than Wnt1, Wnt7a, and Wnt9a indicates poor prognosis in breast cancer. *Int J Clin*  
472 *Exp Pathol*. 2018;11:4552–61.
- 473 6. Yeo EJ, Cassetta L, Qian BZ, Lewkowich I, Li JF, Stefater JA, et al. Myeloid wnt7b  
474 mediates the angiogenic switch and metastasis in breast cancer. *Cancer Res*.  
475 2014;74:2962–73.
- 476 7. Weber-Hall SJ, Phippard DJ, Niemeyer CC, Dale TC. Developmental and hormonal  
477 regulation of Wnt gene expression in the mouse mammary gland. *Differentiation* [Internet].  
478 Elsevier; 1994 [cited 2020 Jul 7];57:205–14. Available from:  
479 <https://www.sciencedirect.com/science/article/pii/S0301468111601618?via%3Dihub>
- 480 8. Kouros-Mehr H, Werb Z. Candidate regulators of mammary branching morphogenesis  
481 identified by genome-wide transcript analysis. *Dev Dyn*. 2006;
- 482 9. Wong GT, Gavin BJ, McMahon AP. Differential transformation of mammary epithelial cells  
483 by Wnt genes. *Mol Cell Biol*. 1994;
- 484 10. Naylor S, Smalley MJ, Robertson D, Gusterson BA, Edwards PAW, Dale TC. Retroviral  
485 expression of Wnt-1 and Wnt-7b produces different effects in mouse mammary epithelium. *J*  
486 *Cell Sci* [Internet]. 2000 [cited 2020 Jul 7];113:2129–38. Available from:  
487 <http://www.stanford.edu/approx>.

- 488 11. Roarty K, Shore AN, Creighton CJ, Rosen JM. Ror2 regulates branching, differentiation,  
489 and actincytoskeletal dynamics within the mammary epithelium. *J Cell Biol* [Internet].  
490 2015;208:351–66. Available from: <http://www.jcb.org/lookup/doi/10.1083/jcb.201408058>
- 491 12. Shimizu H, Julius MA, Giarre M, Zheng Z, Brown AMC, Kitajewski J. Transformation by  
492 wnt family proteins correlates with regulation of  $\beta$ -catenin. *Cell Growth Differ*. 1997;
- 493 13. Cai C, Yu QC, Jiang W, Liu W, Song W, Yu H, et al. R-spondin1 is a novel hormone  
494 mediator for mammary stem cell self-renewal. *Genes Dev*. 2014;
- 495 14. Krimpenfort P, Snoek M, Lambooi JP, Song JY, van der Weide R, Bhaskaran R, et al. A  
496 natural WNT signaling variant potently synergizes with Cdkn2ab loss in skin carcinogenesis.  
497 *Nat Commun*. 2019;
- 498 15. Bach K, Pensa S, Grzelak M, Hadfield J, Adams DJ, Marioni JC, et al. Differentiation  
499 dynamics of mammary epithelial cells revealed by single-cell RNA sequencing. *Nat*  
500 *Commun*. 2017;
- 501 16. Schaum N, Karkanas J, Neff NF, May AP, Quake SR, Wyss-Coray T, et al. Single-cell  
502 transcriptomics of 20 mouse organs creates a Tabula Muris. *Nature*. 2018;
- 503 17. Ni M, Chen Y, Lim E, Wimberly H, Bailey STT, Imai Y, et al. Targeting Androgen  
504 Receptor in Estrogen Receptor-Negative Breast Cancer. *Cancer Cell* [Internet]. Cell Press;  
505 2011 [cited 2020 Jul 7];20:119–31. Available from:  
506 <https://www.sciencedirect.com/science/article/pii/S1535610811001966?via%3Dihub#fig3>
- 507 18. Ramos J, Das J, Felty Q, Yoo C, Poppiti R, Murrell D, et al. NRF1 motif sequence-  
508 enriched genes involved in ER/PR –ve HER2 +ve breast cancer signaling pathways. *Breast*  
509 *Cancer Res Treat*. 2018;
- 510 19. Fernandez-Valdivia R, Mukherjee A, Creighton CJ, Buser AC, DeMayo FJ, Edwards DP,  
511 et al. Transcriptional response of the murine mammary gland to acute progesterone  
512 exposure. *Endocrinology*. 2008;
- 513 20. Shu W, Jiang YQ, Lu MM, Morrissey EE. Wnt7b regulates mesenchymal proliferation and  
514 vascular development in the lung. *Development*. 2002;
- 515 21. Rajagopal J, Carroll TJ, Guseh JS, Bores SA, Blank LJ, Anderson WJ, et al. Wnt7b  
516 stimulates embryonic lung growth by coordinately increasing the replication of epithelium  
517 and mesenchyme. *Development*. 2008;
- 518 22. Yu J, Carroll TJ, Rajagopal J, Kobayashi A, Ren Q, McMahon AP. A Wnt7b-dependent  
519 pathway regulates the orientation of epithelial cell division and establishes the cortico-

- 520 medullary axis of the mammalian kidney. *Development*. 2009;
- 521 23. Shin HY, Willi M, Yoo KH, Zeng X, Wang C, Metsier G, et al. Hierarchy within the  
522 mammary STAT5-driven Wap super-enhancer. *Nat Genet*. 2016;
- 523 24. Downen JM, Fan ZP, Hnisz D, Ren G, Abraham BJ, Zhang LN, et al. Control of cell  
524 identity genes occurs in insulated neighborhoods in mammalian chromosomes. *Cell*. 2014;
- 525 25. Novo CL, Javierre BM, Cairns J, Segonds-Pichon A, Wingett SW, Freire-Pritchett P, et  
526 al. Long-Range Enhancer Interactions Are Prevalent in Mouse Embryonic Stem Cells and  
527 Are Reorganized upon Pluripotent State Transition. *Cell Rep*. 2018;
- 528 26. Whyte WA, Orlando DA, Hnisz D, Abraham BJ, Lin CY, Kagey MH, et al. Master  
529 transcription factors and mediator establish super-enhancers at key cell identity genes. *Cell*.  
530 2013;
- 531 27. Pott S, Lieb JD. What are super-enhancers? *Nat. Genet*. 2015.
- 532 28. Khan A, Zhang X. DbSUPER: A database of Super-enhancers in mouse and human  
533 genome. *Nucleic Acids Res [Internet]*. 2016 [cited 2020 Jul 25];44:D164–71. Available from:  
534 <http://bioinfo.au>.
- 535 29. Chen C, Zhou D, Gu Y, Wang C, Zhang M, Lin X, et al. SEA version 3.0: a  
536 comprehensive extension and update of the Super-Enhancer archive. *Nucleic Acids Res*  
537 *[Internet]*. 2020 [cited 2020 Jul 25];48. Available from: [https://academic.oup.com/nar/article-](https://academic.oup.com/nar/article-abstract/48/D1/D198/5610346)  
538 [abstract/48/D1/D198/5610346](https://academic.oup.com/nar/article-abstract/48/D1/D198/5610346)
- 539 30. Adam RC, Yang H, Rockowitz S, Larsen SB, Nikolova M, Oristian DS, et al. Pioneer  
540 factors govern super-enhancer dynamics in stem cell plasticity and lineage choice. *Nature*.  
541 2015;
- 542 31. Girardi RR, Chung C-Y, Heinz RE, Perou CM, Wahl GM, Spike BT. Single-Cell  
543 Transcriptomes Distinguish Stem Cell State Changes and Lineage Specification Programs in  
544 Early Mammary Gland Development. *CellReports [Internet]*. 2018 [cited 2020 Jul  
545 15];24:1653-1666.e7. Available from: <https://doi.org/10.1016/j.celrep.2018.07.025>
- 546 32. Lupiáñez DG, Kraft K, Heinrich V, Krawitz P, Brancati F, Klopocki E, et al. Disruptions of  
547 topological chromatin domains cause pathogenic rewiring of gene-enhancer interactions.  
548 *Cell [Internet]*. 2015;161:1012–25. Available from:  
549 <http://www.ncbi.nlm.nih.gov/pubmed/25959774>
- 550 33. Wang Y, Song F, Zhang B, Zhang L, Xu J, Kuang D, et al. The 3D Genome Browser: A  
551 web-based browser for visualizing 3D genome organization and long-range chromatin

- 552 interactions. *Genome Biol. Genome Biology*; 2018;19:1–12.
- 553 34. Dixon JR, Selvaraj S, Yue F, Kim A, Li Y, Shen Y, et al. Topological domains in  
554 mammalian genomes identified by analysis of chromatin interactions. *Nature*. Nature  
555 Publishing Group; 2012;485:376–80.
- 556 35. Rao SSP, Huntley MH, Durand NC, Stamenova EK, Bochkov ID, Robinson JT, et al. A  
557 3D map of the human genome at kilobase resolution reveals principles of chromatin looping.  
558 *Cell*. Elsevier Inc.; 2014;159:1665–80.
- 559 36. Krefting J, Andrade-Navarro MA, Ibn-Salem J. Evolutionary stability of topologically  
560 associating domains is associated with conserved gene regulation. *BMC Biol*. 2018;
- 561 37. McArthur E, Capra JA. Topologically associating domain (TAD) boundaries stable across  
562 diverse cell types are evolutionarily constrained and enriched for heritability. *bioRxiv*. 2020;
- 563 38. Bonev B, Mendelson Cohen N, Szabo Q, Fritsch L, Papadopoulos GL, Lubling Y, et al.  
564 Multiscale 3D Genome Rewiring during Mouse Neural Development. *Cell*. 2017;
- 565 39. Doynova MD, Markworth JF, Cameron-Smith D, Vickers MH, O’Sullivan JM. Linkages  
566 between changes in the 3D organization of the genome and transcription during myotube  
567 differentiation in vitro. *Skelet Muscle*. 2017;
- 568 40. Chung CY, Ma Z, Dravis C, Preissl S, Poirion O, Luna G, et al. Single-Cell Chromatin  
569 Analysis of Mammary Gland Development Reveals Cell-State Transcriptional Regulators  
570 and Lineage Relationships. *Cell Rep*. 2019;
- 571 41. Dravis C, Chung CY, Lytle NK, Herrera-Valdez J, Luna G, Trejo CL, et al. Epigenetic and  
572 Transcriptomic Profiling of Mammary Gland Development and Tumor Models Disclose  
573 Regulators of Cell State Plasticity. *Cancer Cell*. 2018;
- 574 42. Pliner HA, Packer JS, McFaline-Figueroa JL, Cusanovich DA, Daza RM, Aghamirzaie D,  
575 et al. Cicero Predicts cis-Regulatory DNA Interactions from Single-Cell Chromatin  
576 Accessibility Data. *Mol Cell*. 2018;
- 577 43. Ovcharenko I, Nobrega MA, Loots GG, Stubbs L. ECR Browser: A tool for visualizing  
578 and accessing data from comparisons of multiple vertebrate genomes. *Nucleic Acids Res*  
579 [Internet]. 2004;32:280–6. Available from: [https://academic.oup.com/nar/article-](https://academic.oup.com/nar/article-lookup/doi/10.1093/nar/gkh355)  
580 [lookup/doi/10.1093/nar/gkh355](https://academic.oup.com/nar/article-lookup/doi/10.1093/nar/gkh355)
- 581 44. James Kent W, Sugnet CW, Furey TS, Roskin KM, Pringle TH, Zahler AM, et al. The  
582 human genome browser at UCSC. *Genome Res*. 2002;12:996–1006.
- 583 45. Ahituv N, Prabhakar S, Poulin F, Rubin EM, Couronne O. Mapping cis-regulatory

- 584 domains in the human genome using multi-species conservation of synteny. *Hum Mol*  
585 *Genet.* 2005;14:3057–63.
- 586 46. Boffelli D, Nobrega MA, Rubin EM. Comparative genomics at the vertebrate extremes.  
587 *Nat Rev Genet.* 2004;5:456–65.
- 588 47. Woolfe A, Goodson M, Goode DK, Snell P, McEwen GK, Vavouri T, et al. Highly  
589 conserved non-coding sequences are associated with vertebrate development. *PLoS Biol.*  
590 2005;3.
- 591 48. Bejerano G, Kent WJ, Haussler D, Pheasant M, Makunin I, Stephen S, et al.  
592 Ultraconserved elements in the human genome. *Science* (80- ). 2004;304:1321–5.
- 593 49. Pennacchio LA, Ahituv N, Moses AM, Prabhakar S, Nobrega MA, Shoukry M, et al. In  
594 vivo enhancer analysis of human conserved non-coding sequences. *Nature.* 2006;444:499–  
595 502.
- 596 50. Plessy C, Dickmeis T, Chalmel F, Strahle U. Enhancer sequence conservation between  
597 vertebrates is favoured in developmental regulator genes. *Trends Genet.* 2005;21:203–7.
- 598 51. Ahituv N, Rubin EM, Nobrega MA. Exploiting human - Fish genome comparisons for  
599 deciphering gene regulation. *Hum Mol Genet.* 2004;13:261–6.
- 600 52. Clevers H. Wnt/ $\beta$ -Catenin Signaling in Development and Disease. *Cell.* 2006;127:469–  
601 80.
- 602 53. Roarty K, Rosen JM. Wnt and mammary stem cells: Hormones cannot fly wingless. *Curr*  
603 *Opin Pharmacol. Elsevier Ltd;* 2010;10:643–9.
- 604 54. Wend P, Holland JD, Ziebold U, Birchmeier W. Wnt signaling in stem and cancer stem  
605 cells. *Semin Cell Dev Biol. Elsevier Ltd;* 2010;21:855–63.
- 606 55. Incassati A, Chandramouli A, Eelkema R, Cowin P. Key signaling nodes in mammary  
607 gland development and cancer:  $\beta$ -catenin. *Breast Cancer Res.* 2010;12:1–14.
- 608 56. Sauvageau M, Goff LA, Lodato S, Bonev B, Groff AF, Gerhardinger C, et al. Multiple  
609 knockout mouse models reveal lincRNAs are required for life and brain development. *Elife.*  
610 2013;
- 611 57. Lai KMV, Gong G, Atanasio A, Rojas J, Quispe J, Posca J, et al. Diverse phenotypes  
612 and specific transcription patterns in twenty mouse lines with ablated lincRNAs. *PLoS One.*  
613 2015;
- 614 58. Madison BB, Jeganathan AN, Mizuno R, Winslow MM, Castells A, Cuatrecasas M, et al.

- 615 Let-7 Represses Carcinogenesis and a Stem Cell Phenotype in the Intestine via Regulation  
616 of Hmga2. *PLoS Genet.* 2015;
- 617 59. Almanzar N, Antony J, Baghel AS, Bakerman I, Bansal I, Barres BA, et al. A single-cell  
618 transcriptomic atlas characterizes ageing tissues in the mouse. *Nature.* 2020;
- 619 60. Schaum N, Lehallier B, Hahn O, Hosseinzadeh S, Lee SE, Sit R, et al. The murine  
620 transcriptome reveals global aging nodes with organ-specific phase and amplitude. *bioRxiv.*  
621 2019;
- 622 61. Yang D, Jang I, Choi J, Kim MS, Lee AJ, Kim H, et al. 3DIV: A 3D-genome Interaction  
623 Viewer and database. *Nucleic Acids Res.* 2018;
- 624 62. Jung I, Schmitt A, Diao Y, Lee AJ, Liu T, Yang D, et al. A compendium of promoter-  
625 centered long-range chromatin interactions in the human genome. *Nat Genet.* 2019;
- 626 63. Papatheodorou I, Moreno P, Manning J, Fuentes AMP, George N, Fexova S, et al.  
627 Expression Atlas update: From tissues to single cells. *Nucleic Acids Res.* 2020;
- 628 64. Wang J, Dai X, Berry LD, Cogan JD, Liu Q, Shyr Y. HACER: An atlas of human active  
629 enhancers to interpret regulatory variants. *Nucleic Acids Res.* 2019;
- 630 65. Fan Z, Chen R, Chen X. SpatialDB: A database for spatially resolved transcriptomes.  
631 *Nucleic Acids Res.* 2020;
- 632 66. Franzén O, Gan LM, Björkegren JLM. PanglaoDB: A web server for exploration of  
633 mouse and human single-cell RNA sequencing data. *Database.* 2019;
- 634 67. Han X, Wang R, Zhou Y, Fei L, Sun H, Lai S, et al. Mapping the Mouse Cell Atlas by  
635 Microwell-Seq. *Cell.* 2018;
- 636 68. Cerami E, Gao J, Dogrusoz U, Gross BE, Sumer SO, Aksoy BA, et al. The cBio Cancer  
637 Genomics Portal: An open platform for exploring multidimensional cancer genomics data.  
638 *Cancer Discov.* 2012;
- 639 69. Gao J, Aksoy BA, Dogrusoz U, Dresdner G, Gross B, Sumer SO, et al. Integrative  
640 analysis of complex cancer genomics and clinical profiles using the cBioPortal. *Sci Signal.*  
641 2013;
- 642 70. Gao T, He B, Liu S, Zhu H, Tan K, Qian J. EnhancerAtlas: A resource for enhancer  
643 annotation and analysis in 105 human cell/tissue types. *Bioinformatics.* 2016;
- 644 71. Gao T, Qian J. EnhancerAtlas 2.0: An updated resource with enhancer annotation in 586  
645 tissue/cell types across nine species. *Nucleic Acids Res.* 2020;

- 646 72. Cardoso-Moreira M, Halbert J, Valloton D, Velten B, Chen C, Shao Y, et al. Gene  
647 expression across mammalian organ development. *Nature*. 2019;
- 648 73. Sarropoulos I, Marin R, Cardoso-Moreira M, Kaessmann H. Developmental dynamics of  
649 lncRNAs across mammalian organs and species. *Nature*. 2019;
- 650
- 651
